# Supplementary material for: Dynamics of an amorphous pharmacologically active compound – diazepam: a QENS study combined with molecular dynamics simulations
Source: Royal Society of Chemistry journal article supplement (doi:10.1039/c7ra06133a), 2017-01-01
Supplement: c7ra06133a1.pdf [file c7ra06133a1.pdf]

**Dynamics of an amorphous pharmacologically active compound - diazepam:  
A QENS study combined with molecular dynamics simulations**

Aleksandra PAJZDERSKA<sup>1\*</sup>, Miguel A. GONZALEZ<sup>2</sup>, Jan P. EMBS<sup>3</sup>, Jadwiga  
MIELCAREK<sup>4</sup>, Jan W. WĄSICKI<sup>1,5</sup>

**SUPPLEMENTARY MATERIALS**

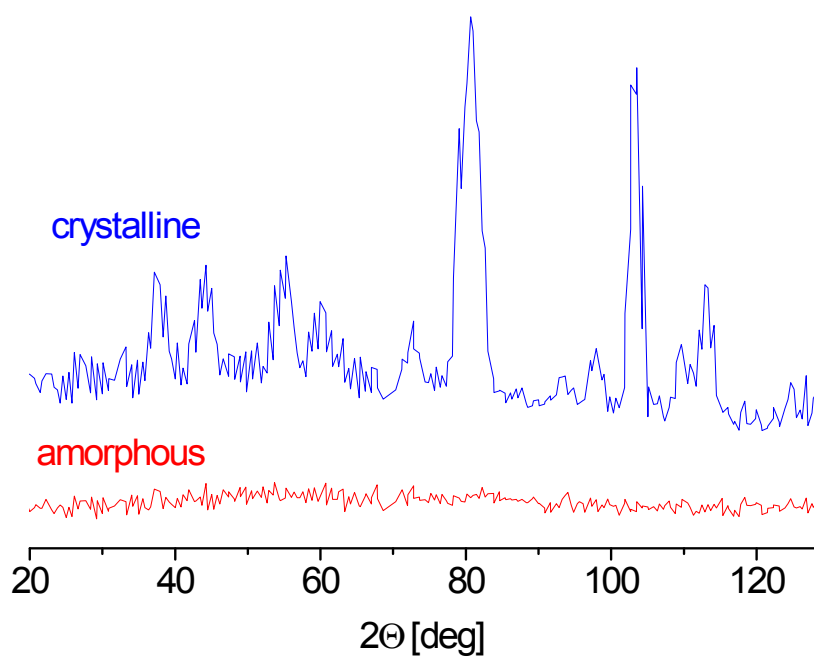

*Fig. 1S. Neutron diffraction pattern for crystalline (top) and amorphous (bottom) samples at 300K.*

a)

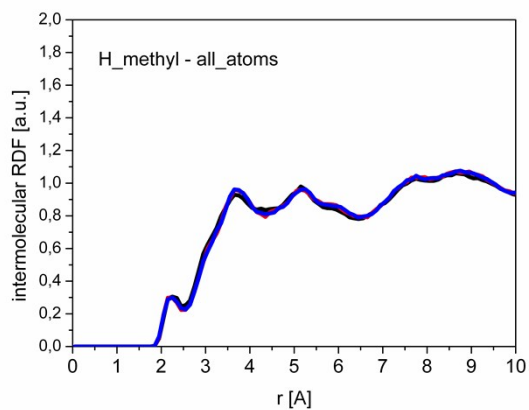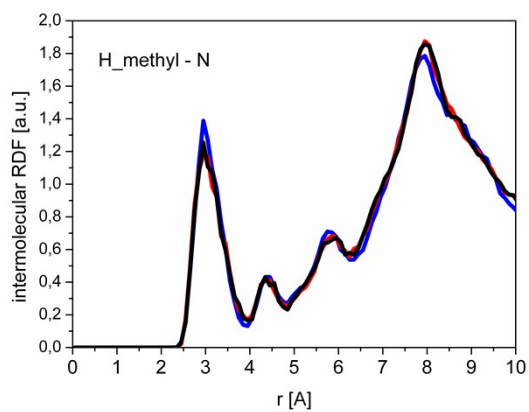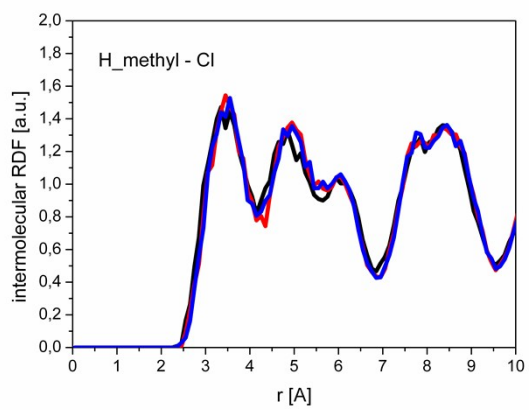

b)

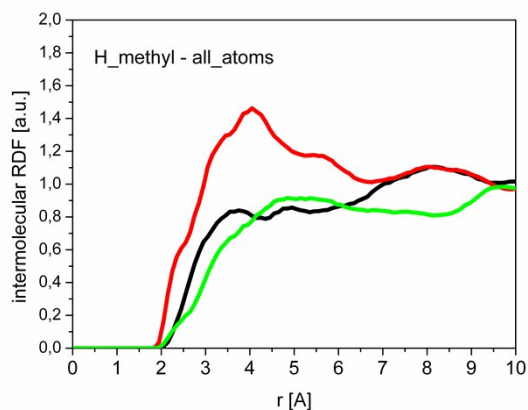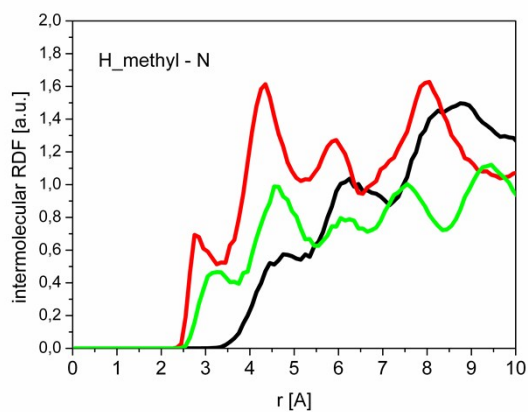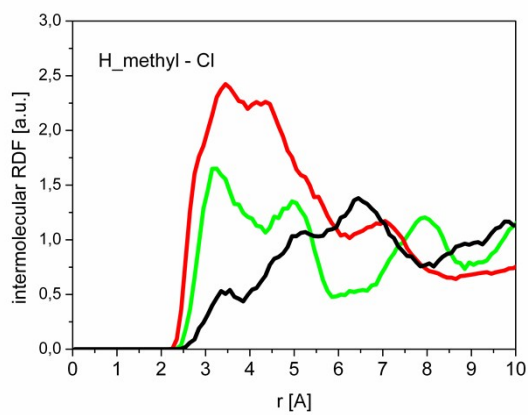

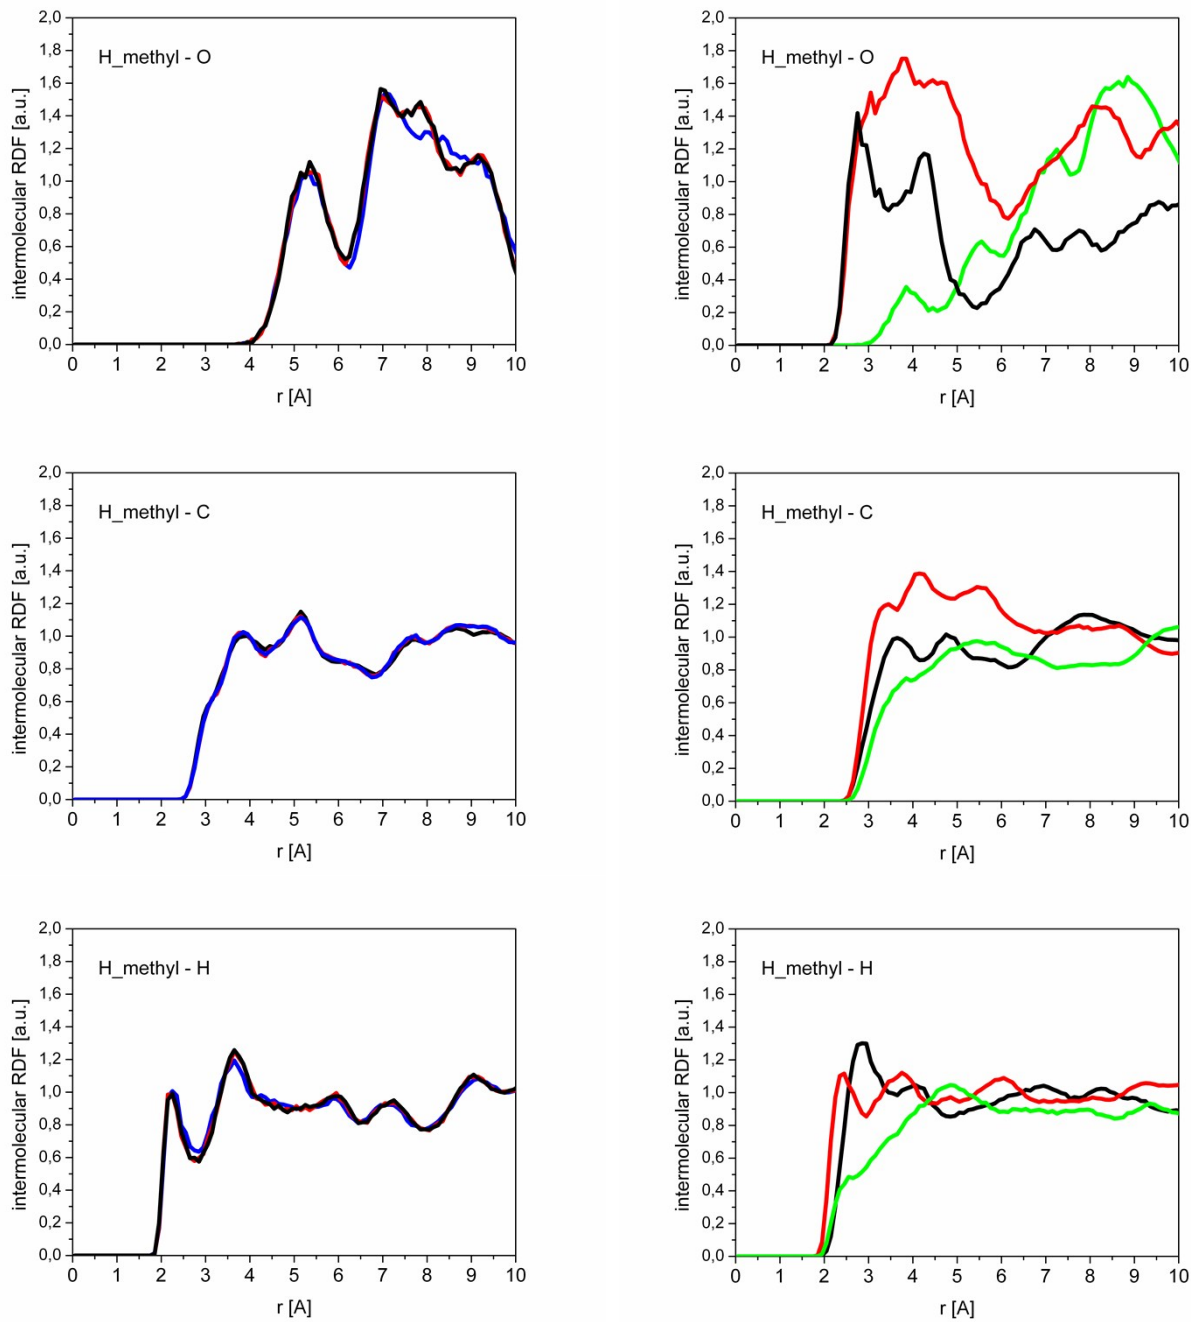

Fig. 2S. The separate contributions from different types of atoms to intermolecular  $H_iX$  RDF (eqn. 9) showing the distance distribution between methyl hydrogens and other atoms in a) crystalline and b) amorphous clusters for 3 selected molecules.
